# Supplementary material for: mTORC2 Signaling Drives the Development and Progression of Pancreatic Cancer
Source: Oxford University Press journal article supplement (doi:10.1158/0008-5472.can-16-0810), 2016-10-06
Supplement: 00085472can160810-sup-163869_1_supp_3649493_wcs8xn.docx [file 00085472can160810-sup-163869_1_supp_3649493_wcs8xn.docx]

**Table S1: Antibodies for immunohistochemistry**

| **Protein** | **Conc.** | **Supplier** | **Catalogue # / Clone** |
| --- | --- | --- | --- |
| Amylase | 1:500 | AbCam | ab21156 |
| Glucagon | 1:50 | Dako | A0565 |
| Insulin | 1:150 | Dako | A0564 |
| pAktS473 | 1:25-1:100 | Cell Signaling Technology | 4060 |
| pAktT308 | 1:200 | Cell Signaling Technology | 4056 |
| pNDRG1T346 | 1:500-800 | Cell Signaling Technology | 5482 |
| pS6S235/236 | 1:800 | Cell Signaling Technology | 4858 |
| p4E-BP1T37/46 | 1:500 | Cell Signaling Technology | 2855 |
| pERKT202/Y204 | 1:100-400 | Cell Signaling Technology | 9101 |
| p16 | 1:250 | Santa Cruz | F-12 |
| BMI1 | 1:300 | Cell Signaling Technology | 5856 |
| Ki67 | 1:200  1:500 | Thermo Scientific  AbCam | RM9106  ab66155 |
| Cleaved caspase 3 | 1:50  1:800 | Cell Signaling Technology  Cell Signaling Technology | 9661  9664 |
| p21 | 1:500  1:250 | Santa Cruz  Santa Cruz | M-19  F-5 |
| p27 | 1:5000  1:250 | BD Biosciences  Santa Cruz | 610242  F-8 |
| CD45 | 1:200 | AbCam | Ab64100 |

**Table S2: shRNA sequences**

| **Target** | **Sequence** |
| --- | --- |
| Rictor shRNA1 | GCGGTTCATACAAGAGTTATT |
| Rictor shRNA2 | GCCAGTAAGATGGGAATCATT |
| GFP | TACAACAGCCACAACGTCTAT |

**Table S3: Antibodies for western blotting**

| **Protein** | **Conc.** | **Supplier** | **Catalogue # / Clone** |
| --- | --- | --- | --- |
| BMI1 | 1:2,000 | AbCam | ab3829 |
| S6 | 1:1,000 | Cell Signaling Technology | 2217 |
| pS6S235/236 | 1:1,000 | Cell Signaling Technology | 4858 |
| 4E-BP1 | 1:1,000 | Cell Signaling Technology | 9644 |
| p4E-BP1T37/46 | 1:1,000 | Cell Signaling Technology | 2855 |
| Akt | 1:1,000  1:1,000 | Cell Signaling Technology  Cell Signaling Technology | 4685  9272 |
| pAktS473 | 1:1,000 | Cell Signaling Technology | 4060 |
| NDRG1 | 1:1,000 | Cell Signaling Technology | 9408 |
| pNDRG1T346 | 1:1,000 | Cell Signaling Technology | 5482 |
| pERK1/2T202/Y204 | 1:2000 | Cell Signaling Technology | 9101 |
| Rictor | 1:1,000  1:1,000 | Cell Signaling Technology  Cell Signaling Technology | 2140  1224 |
| Raptor | 1:1,000 | Cell Signaling Technology | 2280 |
| cMyc | 1:1,000 | Cell Signaling Technology | 9402 |
| p16 | 1:1,000 | Santa Cruz | M-156 |
| p21 | 1:1,000 | Santa Cruz | F-5 |
| p27 | 1:1,000  1:1,000 | BD Biosciences  Santa Cruz | 610242  F-8 |
| α-Tubulin | 1:1,000 | Developmental Studies Hybridoma Bank | 12G10 |
| GAPDH | 1:10,000 | Cell Signaling Technology | 2118 |
